# Supplementary material for: Prognostic Impact and Predictors of New-Onset Atrial Fibrillation in Heart Failure
Source: MDPI journal article supplement (doi:10.3390/life12040579), 2022-04-13
Supplement: s1 [file s1]

Supplementary Table S1. Baseline characteristics according to previous AF history

|                                            | AF history (+)<br>(n = 2693) | AF history (-)<br>(n = 2932) | <b>p value</b> |
|--------------------------------------------|------------------------------|------------------------------|----------------|
| <b>Demographics</b>                        |                              |                              |                |
| Age, year                                  | 70.9 ±12.8                   | 66.3 ±15.6                   | < 0.001        |
| Male (%).                                  | 1402 (52.1)                  | 1591 (54.3)                  | 0.10           |
| BMI, kg/m <sup>2</sup>                     | 23.3 ±3.85                   | 23.3 ±3.92                   | 0.58           |
| Current smoking (%)                        | 371 (13.8)                   | 622 (21.2)                   | < 0.001        |
| <b>Comorbidities</b>                       |                              |                              |                |
| Hypertension (%)                           | 1632 (60.6)                  | 1693 (57.7)                  | 0.03           |
| Diabetes mellitus (%)                      | 828 (30.7)                   | 1158 (39.5)                  | < 0.001        |
| Chronic kidney disease (%)                 | 365 (13.6)                   | 440 (15.0)                   | 0.13           |
| Chronic obstructive lung disease (%)       | 345 (12.8)                   | 288 (9.82)                   | < 0.001        |
| Cerebrovascular accident (%)               | 497 (18.5)                   | 356 (12.1)                   | < 0.001        |
| Implantable cardioverter defibrillator (%) | 49 (1.82)                    | 37 (1.26)                    | 0.11           |
| Cardiac resynchronization therapy (%)      | 13 (0.48)                    | 20 (0.68)                    | 0.42           |
| <b>Etiology</b>                            |                              |                              |                |
| Ischemic heart disease (%)                 | 669 (24.9)                   | 918 (31.3)                   | < 0.001        |
| Dilated cardiomyopathy (%)                 | 223 (8.28)                   | 250 (8.53)                   | 0.78           |
| Valvular heart disease (%)                 | 577 (21.4)                   | 231 (7.88)                   | < 0.001        |

|                                   | AF history (+)<br>(n = 2693) | AF history (-)<br>(n = 2932) | p value |
|-----------------------------------|------------------------------|------------------------------|---------|
| Clinical status on admission      |                              |                              |         |
| Lung congestion                   | 2132 (79.2)                  | 2305 (78.6)                  | 0.64    |
| Heart failure category            |                              |                              | < 0.001 |
| De novo heart failure             | 1199 (44.5)                  | 1737 (59.2)                  |         |
| Acute decompensated heart failure | 1494 (55.5)                  | 1195 (40.8)                  |         |
| Acute kidney injury               | 428 (15.9)                   | 318 (10.8)                   | < 0.001 |
| Systolic BP, mmHg                 | 129 (28.8)                   | 133 (31.4)                   | < 0.001 |
| Diastolic BP, mmHg                | 77.9 (18.8)                  | 79.2 (18.7)                  | 0.01    |
| Heart rate, beats/min             | 94.7 (29.3)                  | 90.7 (22.3)                  | < 0.001 |
| NYHA class (%)                    |                              |                              | 0.005   |
| II                                | 369 (13.7)                   | 486 (16.6)                   |         |
| III                               | 1032 (38.3)                  | 1042 (35.5)                  |         |
| IV                                | 1292 (48.0)                  | 1404 (47.9)                  |         |
| Hemoglobin, g/dL                  | 12.5 ± 2.24                  | 12.3 ± 2.37                  | 0.03    |
| Creatinine, mg/dL                 | 1.43 ± 1.31                  | 1.54 ± 1.61                  | 0.007   |
| BUN, mg/dL                        | 27.0 ± 16.7                  | 25.6 ± 16.2                  | 0.001   |
| BNP, pg/mL                        | 1172 ± 1211                  | 1485 ± 1363                  | < 0.001 |
| NT-proBNP, pg/mL                  | 9088 ± 10158                 | 9376 ± 11355                 | 0.46    |

|                                             | AF history (+)<br>(n = 2693) | AF history (-)<br>(n = 2932) | p value |
|---------------------------------------------|------------------------------|------------------------------|---------|
| Electrocardiographic parameters             |                              |                              |         |
| RBBB (%)                                    | 213 (7.91)                   | 185 (6.31)                   | 0.02    |
| LBBB (%)                                    | 103 (3.82)                   | 191 (6.51)                   | < 0.001 |
| Interventricular conduction disturbance (%) | 170 (6.31)                   | 177 (6.04)                   | 0.71    |
| Q wave (%)                                  | 312 (11.6)                   | 430 (14.7)                   | 0.001   |
| PR interval, msec                           | 173 ± 57.0                   | 168 ± 37.8                   | 0.06    |
| QRS width, msec                             | 106 ± 29.1                   | 108 ± 33.2                   | 0.03    |
| QT interval, msec                           | 378 ± 69.6                   | 397 ± 60.6                   | < 0.001 |
| Corrected QT interval, msec                 | 473 ± 48.3                   | 476 ± 45.2                   | 0.01    |
| Heart rate, beats/min                       | 102 ± 31.5                   | 91.0 ± 28.0                  | < 0.001 |
| Echocardiographic parameters                |                              |                              |         |
| LV end-diastolic dimension, mm              | 56.3 ± 9.91                  | 58.5 ± 10.2                  | < 0.001 |
| LV end-systolic dimension, mm               | 43.7 ± 12.0                  | 46.7 ± 12.5                  | < 0.001 |
| LV EF, %                                    | 42.2 ± 15.2                  | 38.9 ± 15.1                  | < 0.001 |
| LA diameter, mm                             | 51.5 ± 10.3                  | 45.2 ± 8.26                  | < 0.001 |
| Peak TR velocity, m/sec                     | 2.90 ± 0.58                  | 2.90 ± 0.61                  | 0.99    |
| Estimated RV systolic pressure, mmHg        | 44.3 ± 14.5                  | 43.6 ± 15.7                  | 0.13    |
| Discharge medication                        |                              |                              |         |

|                              | AF history (+)<br>(n = 2693) | AF history (-)<br>(n = 2932) | <b>p value</b> |
|------------------------------|------------------------------|------------------------------|----------------|
| RAS blocker (%)              | 1606 (59.6)                  | 2102 (71.7)                  | < 0.001        |
| Beta-blocker (%)             | 1204 (44.7)                  | 1602 (54.6)                  | < 0.001        |
| Aldosterone antagonist (%)   | 1230 (45.7)                  | 1296 (44.2)                  | 0.28           |
| Nitrates (%)                 | 695 (25.7)                   | 54 (28.9)                    | 0.38           |
| Loop diuretics (%)           | 1935 (71.9)                  | 2056 (70.1)                  | 0.16           |
| Thiazide (%)                 | 236 (8.76)                   | 221 (7.54)                   | 0.10           |
| Statin (%)                   | 869 (32.3)                   | 1459 (49.8)                  | < 0.001        |
| Clinical status on discharge |                              |                              |                |
| BMI, kg/m <sup>2</sup>       | 23.3 ± 3.81                  | 22.5 ± 3.83                  | 0.60           |
| Systolic BP, mmHg            | 114 ± 16.5                   | 115 ± 18.4                   | 0.07           |
| Diastolic BP, mmHg           | 66.9 ± 11.4                  | 67.3 ± 11.5                  | 0.19           |
| Heart rate, beats/min        | 76.0 ± 15.0                  | 77.5 ± 13.4                  | < 0.001        |
| NYHA class (%)               |                              |                              | < 0.001        |
| I                            | 394 (14.6)                   | 555 (18.9)                   |                |
| II                           | 1722 (63.9)                  | 1955 (66.7)                  |                |
| III                          | 159 (5.90)                   | 187 (6.38)                   |                |
| IV                           | 85 (3.16)                    | 127 (4.33)                   |                |
| Creatinine, mg/dL            | 1.34 ± 1.20                  | 1.45 ± 1.49                  | 0.004          |

|                  | AF history (+)<br>(n = 2693) | AF history (-)<br>(n = 2932) | <b>p value</b> |
|------------------|------------------------------|------------------------------|----------------|
| BUN, mg/dL       | 25.3 ± 16.8                  | 24.1 ± 15.1                  | 0.004          |
| BNP, pg/mL       | 1048 ± 1144                  | 1281 ± 1290                  | < 0.001        |
| NT-proBNP, pg/mL | 8798 ± 9889                  | 8683 ± 11147                 | 0.76           |

NOAF, new-onset atrial fibrillation; BMI, body mass index; BP, blood pressure; NYHA, New York Heart Association; BUN, blood urea nitrogen; BNP, blood natriuretic peptide; NT-proBNP, N-terminal proBNP; RBBB, right bundle branch block; LBBB, left bundle branch block; LV, left ventricular; EF, ejection fraction; LA, left atrium; TR, tricuspid regurgitation; RV, right ventricular; RAS, renin-angiotensin system
